# Supplementary material for: Robust heterostructures of a bimetallic sodium–zinc metal–organic framework and reduced graphene oxide for high-performance supercapacitors
Source: Royal Society of Chemistry journal article supplement (doi:10.1039/c8ta09528k), 2018-12-18
Supplement: c8ta09528k1.pdf [file c8ta09528k1.pdf]

## **Robust heterostructure of bimetallic sodium–zinc metal–organic framework and reduced graphene oxide for high–performance supercapacitors**

**Richa Rajak,<sup>a</sup> Mohit Saraf,<sup>b</sup> and Shaikh M. Mobin<sup>\*a,b,c</sup>**

<sup>a</sup>Discipline of Chemistry, <sup>b</sup>Discipline of Metallurgy Engineering and Materials Science and

<sup>c</sup>Discipline Biosciences and Biomedical Engineering, Indian Institute of Technology Indore, Simrol, Khandwa Road, Indore 453552, India

\*E-mail: [xray@iiti.ac.in](mailto:xray@iiti.ac.in)

Tel: +91 731 2438 752

## Contents:

**Fig. S1** PXRD spectra of **1**. (Simulated: Blue, As-synthesised: Red)

**Fig. S2** PXRD of rGO (**2**).

**Fig. S3** PXRD spectra of **1** and different heterostructures of **3** formed at different ratio of **1** and **2**. (For e.g. 5:95 indicates 5% of **2** and 95% of **1**, 10:90 indicates 10% of **2** and 90% of **1** and so on...)

**Fig. S4** TGA graphs of **1**, **2** and **3** (a-c) separately, and (d) all-together.

**Fig. S5** N<sub>2</sub> isotherm and corresponding BJH desorption pore size distribution profile of **1**.

**Fig. S6** N<sub>2</sub> isotherm and corresponding BJH desorption pore size distribution profile of **2**.

**Fig. S7** N<sub>2</sub> isotherm and corresponding BJH desorption pore size distribution profile of **3**.

**Fig. S8** FT-IR spectrum of **1**.

**Fig. S9** SEM image of (a,b) **1**, (c,d) **2**, and (e,f) **3**.

**Fig. S10** TEM image of **1** and **3**.

**Fig. S11** XPS spectra of **1** (a) survey scan, (b) Zn 2p, (c) Na 1s, (d) O 1s, (e) N 1s, (f) C 1s and (g) Elemental analysis of **1**.

**Fig. S12** XPS spectra of **3** (a) survey scan, (b) Zn 2p, (c) Na 1s, (d) O 1s, (e) N 1s, (f) C 1s and (g) Elemental analysis of **3**.

**Fig. S13** XPS spectra after cycling of **3** (a) survey scan, (b) Zn 2p, (c) Na 1s, (d) O 1s, (e) N 1s, (f) C 1s and (g) Elemental analysis after cycling of **3**.

**Fig. S14** Assymetric unit of **1**. Color code: Zn (dark green), Na (light green), C (dark gray), N (blue), O (red), H (white).

**Fig. S15** Distorted trigonal bipyramidal and octahedral co-ordination geometry around Zn(II) and Na(I) ion, respectively, present in **1**.

**Fig. S16** Representation of [Zn<sub>2</sub>NaO<sub>8</sub>] cluster in **1**.

**Scheme S1**. Coordination modes of ligands in **1**.

**Fig. S17** Space fill model of the 2D Framework along *b*-axis in **1**.

**Fig. S18** (a) A series of formed heterostructure **3** at different ratios of **1** and **2**, and (b,c) CV and GCD plots of formed heterostructures of **3** at different ratios of **1** and **2**. (Here. 5:95 indicates 5% of **2** and 95% of **1**, 10:90 indicates 10% of **2** and 90% of **1** and so on...)

**Fig. S19** GCD plots and SEM images of **3-GCE** (a) before and (b) after cycling.

**Fig. S20** (a) Comparison of CV profiles of bare GCE and **3-GCE** at 100 mV s<sup>-1</sup>, (b) CV profiles of **3-GCE** at varied scan rates (10–300 mV s<sup>-1</sup>), (c) GCD plots of **3-GCE** at different current densities (1.6–4 A g<sup>-1</sup>), and (d) plot between specific capacitance and current density. (All results at higher mass loading ~3.5 mg/cm<sup>2</sup>)

**Table S1.** Bond lengths [Å] and angles [°] for **1**.

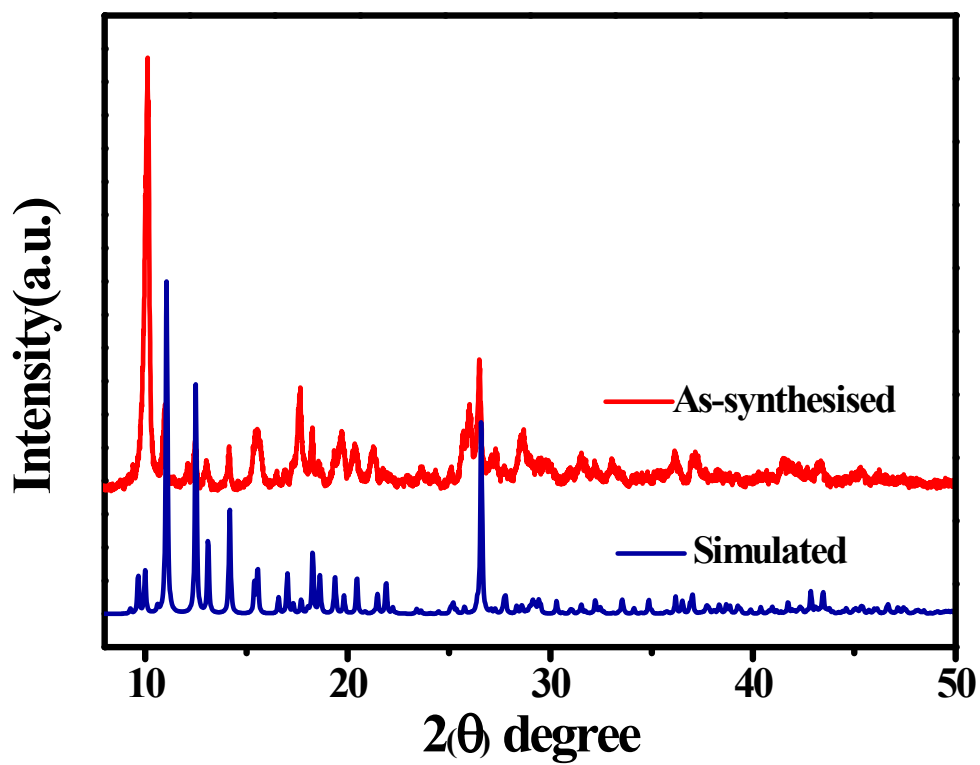

Fig. S1 PXRd spectra of 1. (Simulated: Blue, As-synthesised: Red)

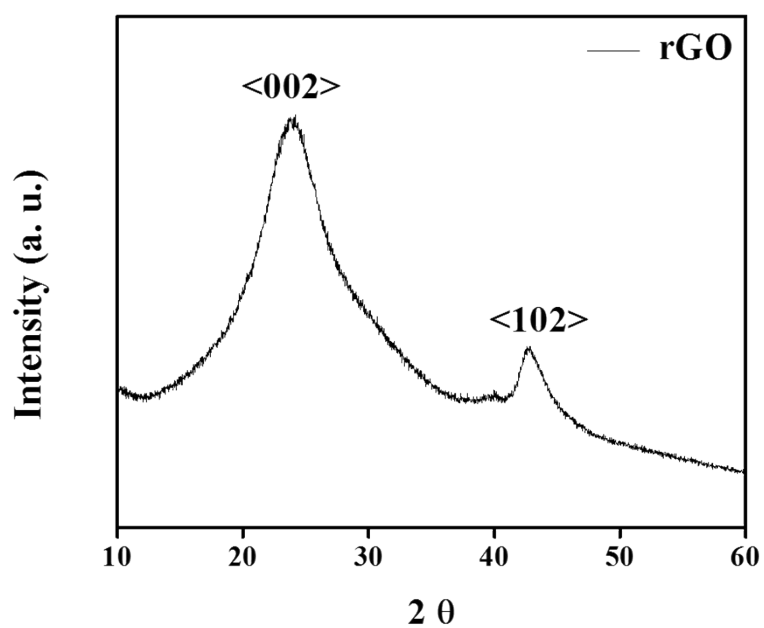

Fig. S2 PXRD of rGO (2).

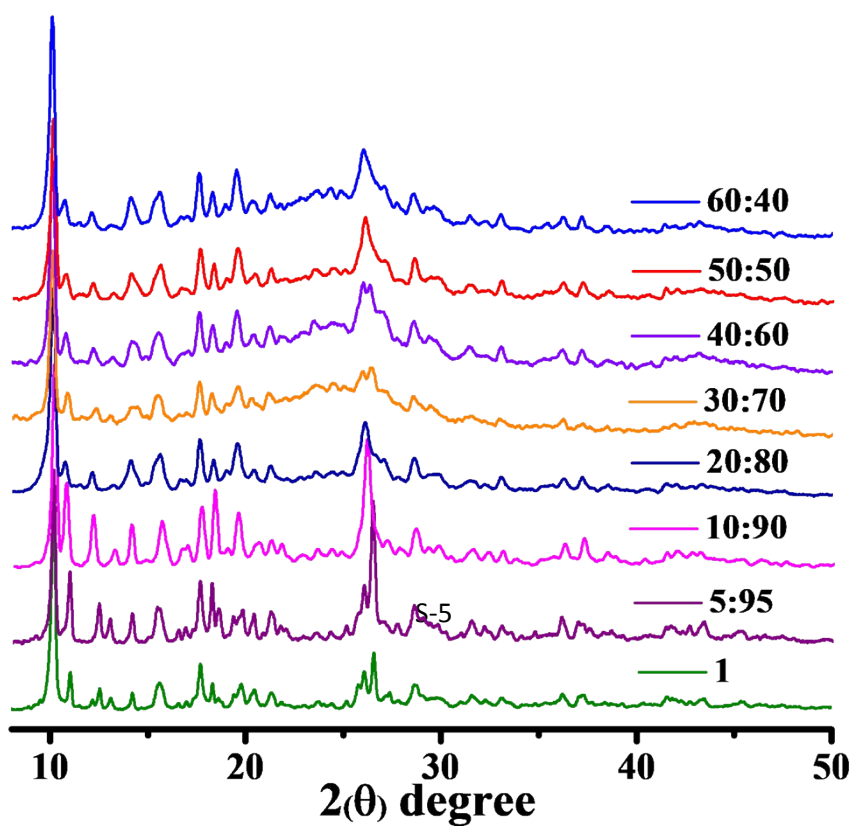

**Fig. S3** PXRD spectra of **1** and different heterostructures of **3** formed at different ratio of **1** and **2**. (For e.g. 5:95 indicates 5% of **2** and 95% of **1**, 10:90 indicates 10% of **2** and 90% of **1** and so on...)

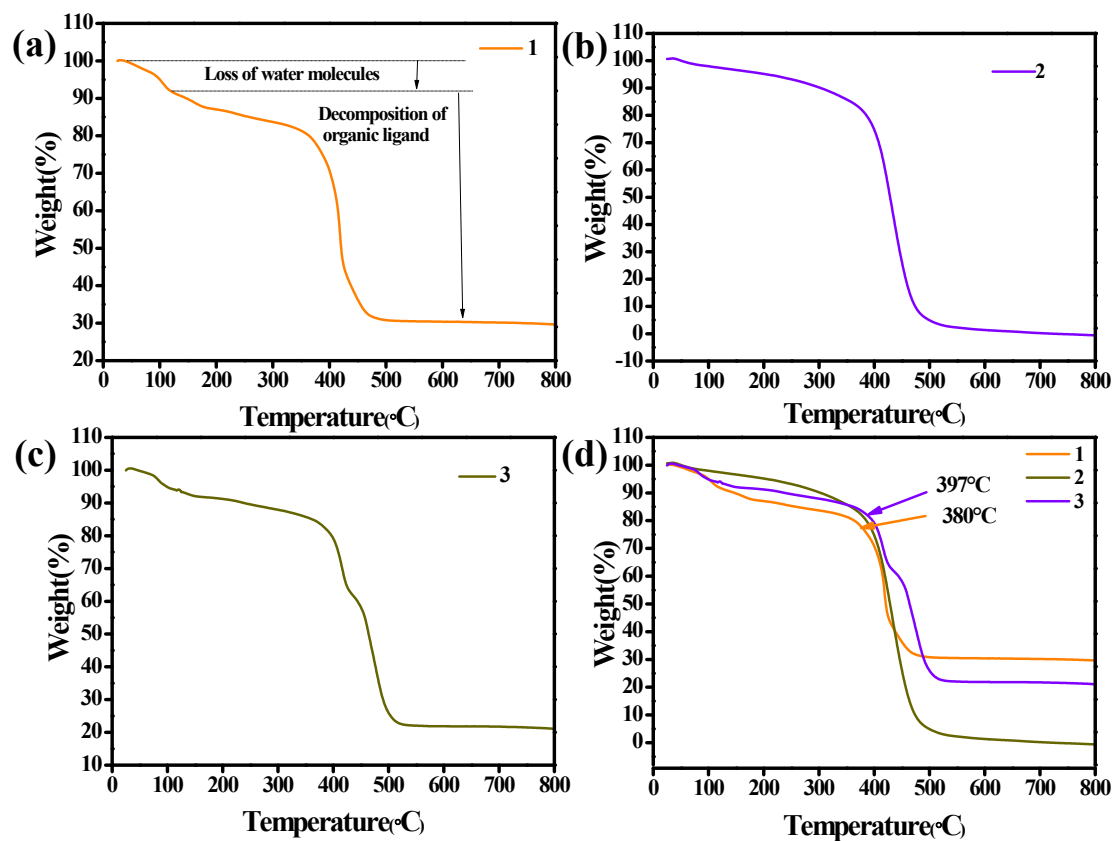

**Fig. S4** TGA graphs of 1, 2 and 3 (a-c) separately, and (d) all-together.

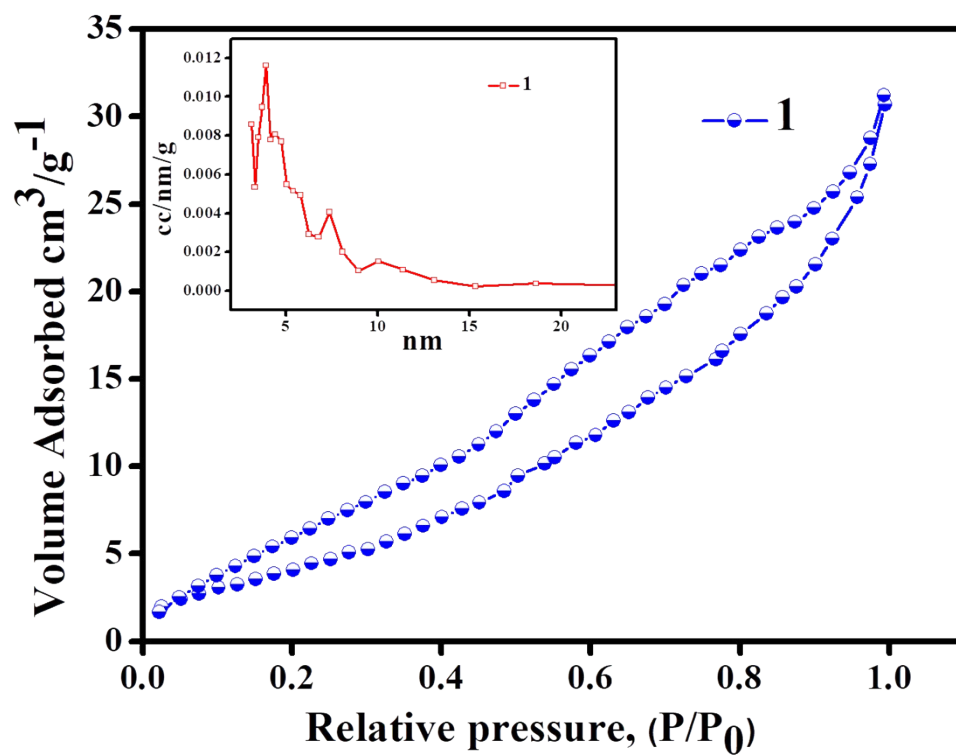

Fig. S5 N<sub>2</sub> isotherm and corresponding BJH desorption pore size distribution profile of 1.



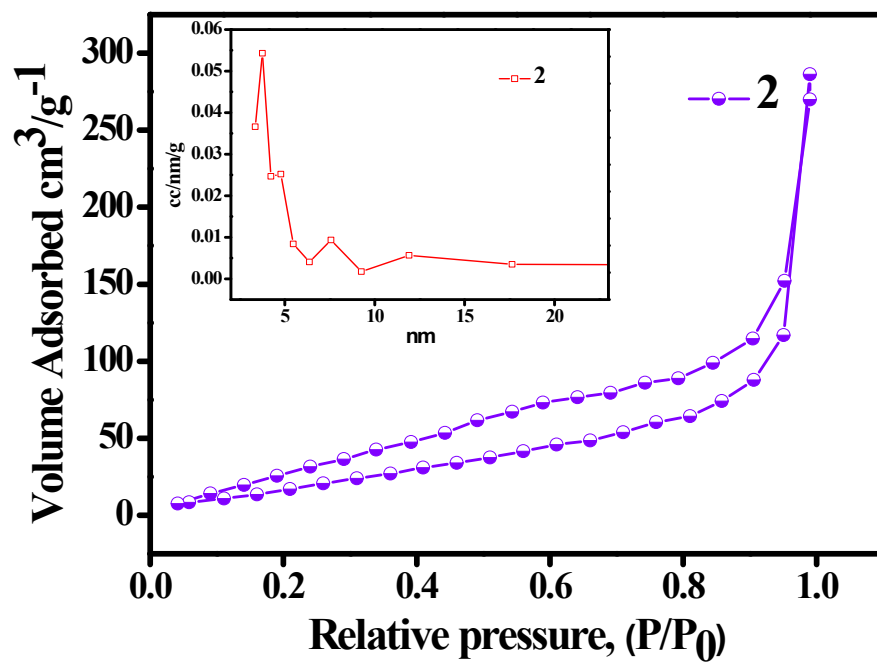

Fig. S6 N<sub>2</sub> isotherm and corresponding BJH desorption pore size distribution profile of 2.

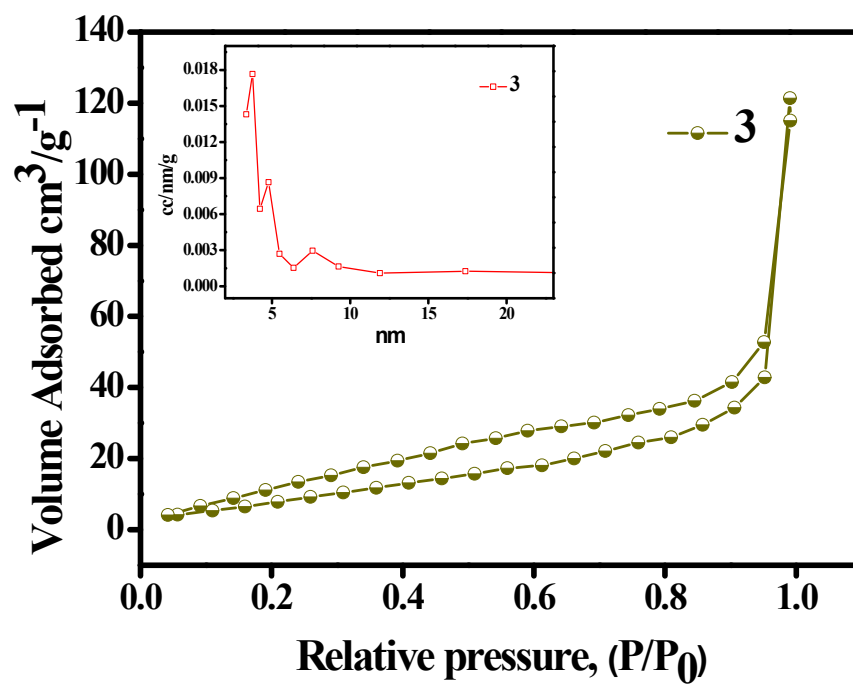

Fig. S7 N<sub>2</sub> isotherm and corresponding BJH desorption pore size distribution profile of 3.

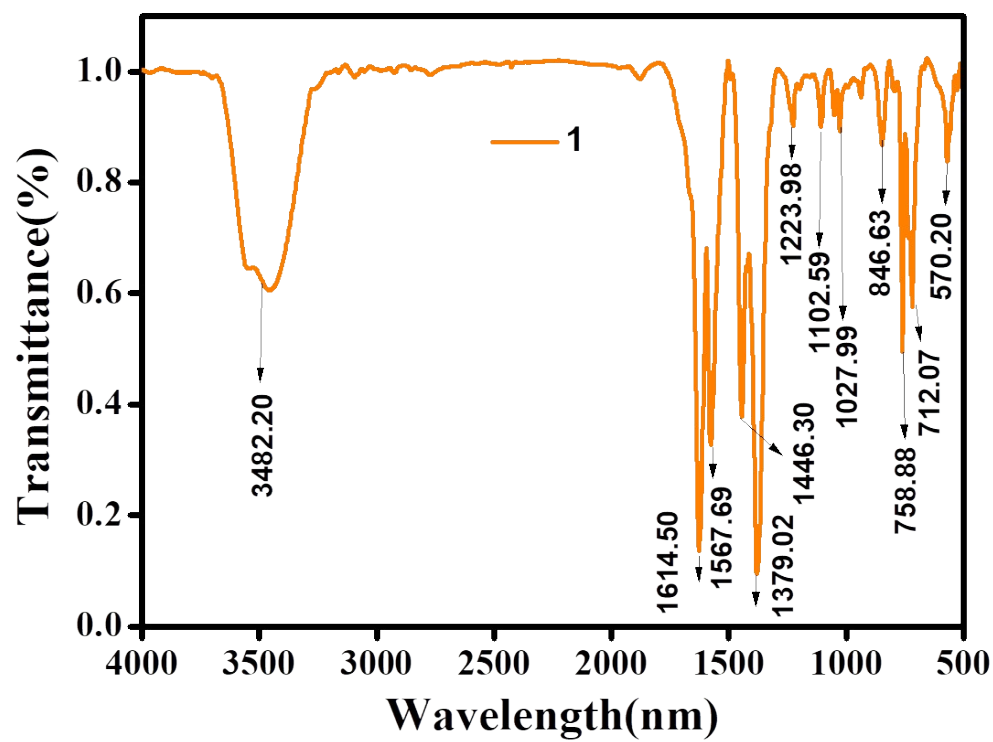

Fig. S8 FT-IR spectrum of 1.

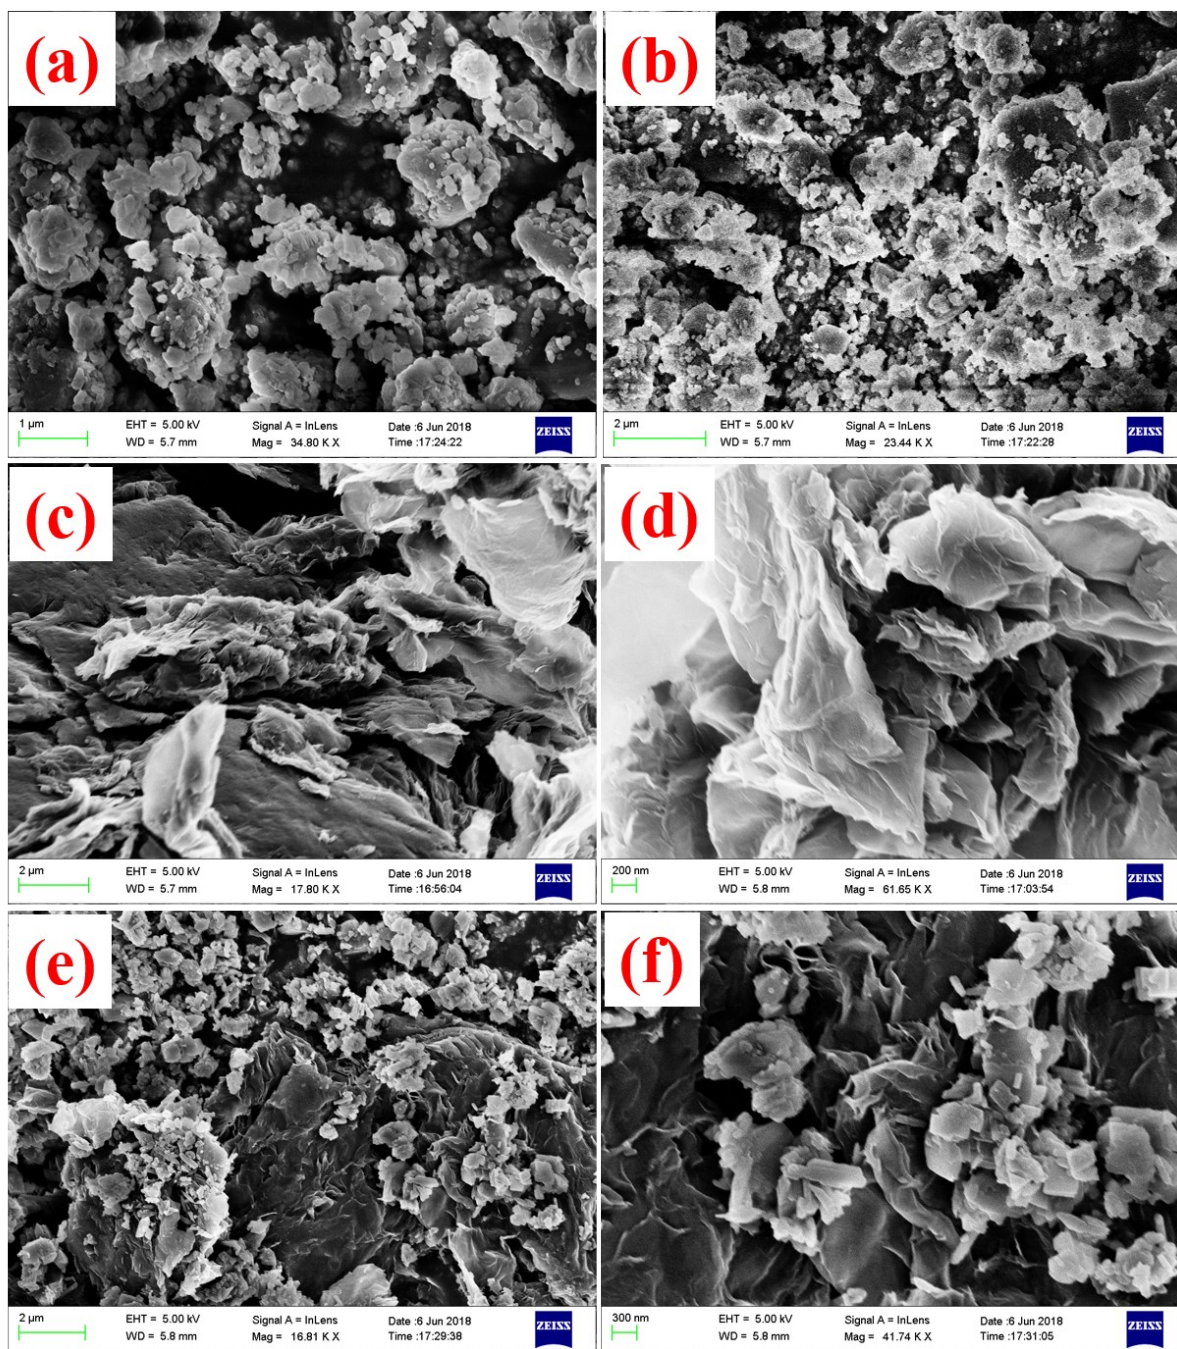

**Fig. S9** SEM image of (a,b) 1, (c,d) 2, and (e,f) 3.

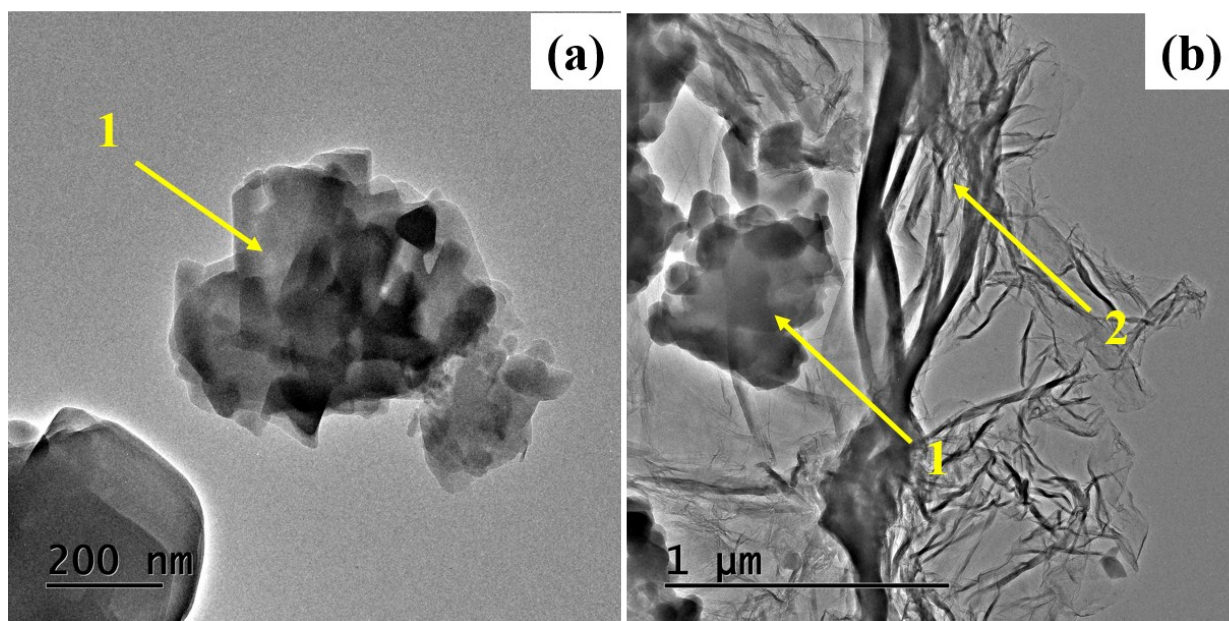

**Fig. S10** TEM image of **1** and **3**.

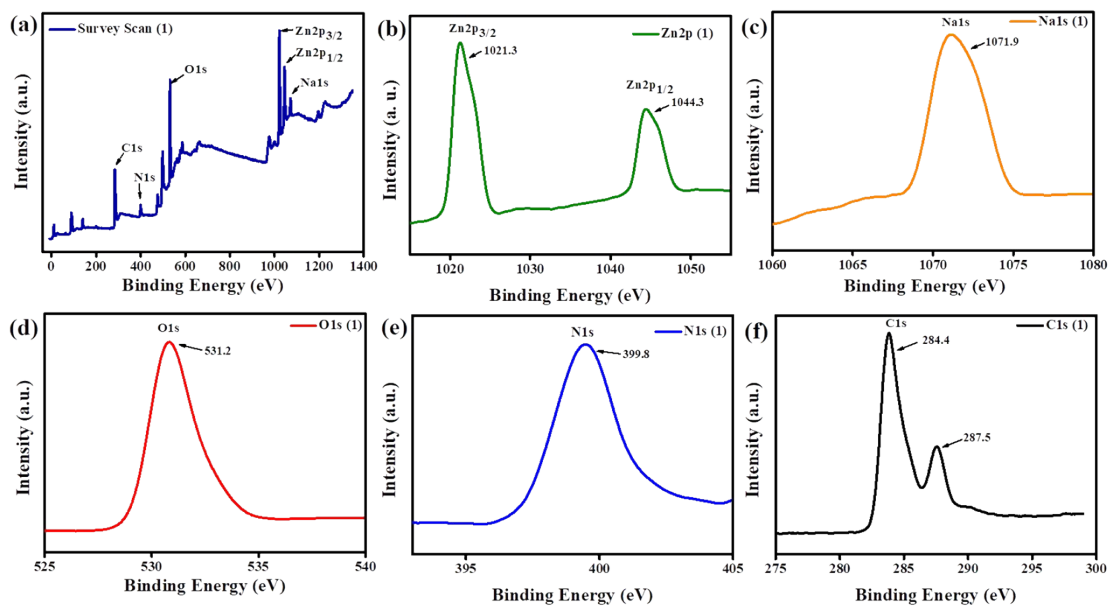

| Peak  | Position BE (eV) | Height (CPS) | FWHM (eV) | Area (P) (CPS.eV) | Atomic % |
|-------|------------------|--------------|-----------|-------------------|----------|
| Na 2s | 63.16            | 11881.37     | 3.13      | 42050.69          | 1.93     |
| C 1s  | 284.47           | 407853.7     | 2.46      | 2026326           | 54.1     |
| N 1s  | 399.8            | 82232.98     | 3.72      | 374863.5          | 6.32     |
| O 1s  | 531.22           | 728154.4     | 3.47      | 2735869           | 28.91    |
| Zn2p  | 1022.03          | 801948.1     | 4.4       | 6024974           | 8.74     |

**Fig. S11** XPS spectra of **1** (a) survey scan, (b) Zn 2p, (c) Na 1s, (d) O 1s, (e) N 1s, (f) C 1s and (g) Elemental analysis of **1**.



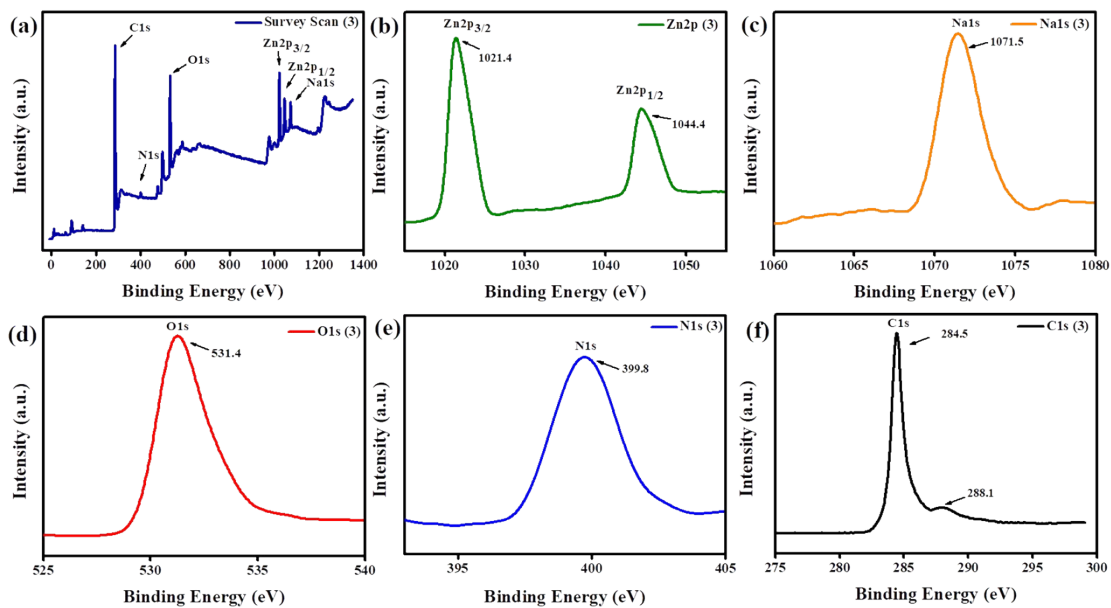

| Peak  | Position BE (eV) | Height (CPS) | FWHM (eV) | Area (P) (CPS.eV) | Atomic % |
|-------|------------------|--------------|-----------|-------------------|----------|
| C 1s  | 284.69           | 482097       | 3.69      | 2163311           | 76.05    |
| N 1s  | 399.88           | 13663.83     | 4.34      | 73181.09          | 1.63     |
| O 1s  | 531.45           | 273406.2     | 4.02      | 1205291           | 16.77    |
| Zn 2p | 1022.08          | 183416.8     | 5.23      | 1603462           | 3.06     |
| Na 1s | 1071.49          | 83252.23     | 3.01      | 406720.2          | 2.49     |

**Fig. S12** XPS spectra of **3** (a) survey scan, (b) Zn 2p, (c) Na 1s, (d) O 1s, (e) N 1s, (f) C 1s and (g) Elemental analysis of **3**.

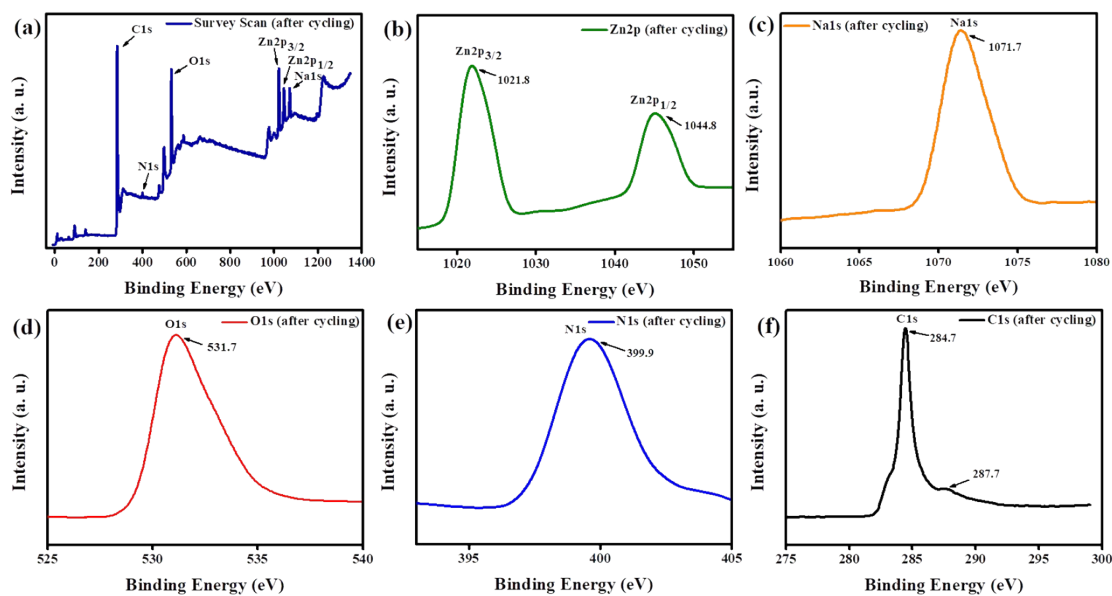

| (g) | Peak  | Position BE (eV) | Height (CPS) | FWHM (eV) | Area (P) (CPS.eV) | Atomic % |
|-----|-------|------------------|--------------|-----------|-------------------|----------|
|     | C 1s  | 284.79           | 476913.9     | 3.72      | 2142535           | 75.81    |
|     | N 1s  | 399.96           | 13431.21     | 4.41      | 72064.33          | 1.61     |
|     | O 1s  | 531.7            | 263838.4     | 4.16      | 1207082           | 16.9     |
|     | Zn 2p | 1022.18          | 182012.1     | 5.25      | 1596427           | 3.07     |
|     | Na 1s | 1071.75          | 80945.31     | 4.85      | 422238.2          | 2.61     |

**Fig. S13** XPS spectra after cycling of **3** (a) survey scan, (b) Zn 2p, (c) Na 1s, (d) O 1s, (e) N 1s, (f) C 1s and (g) Elemental analysis after cycling of **3**.



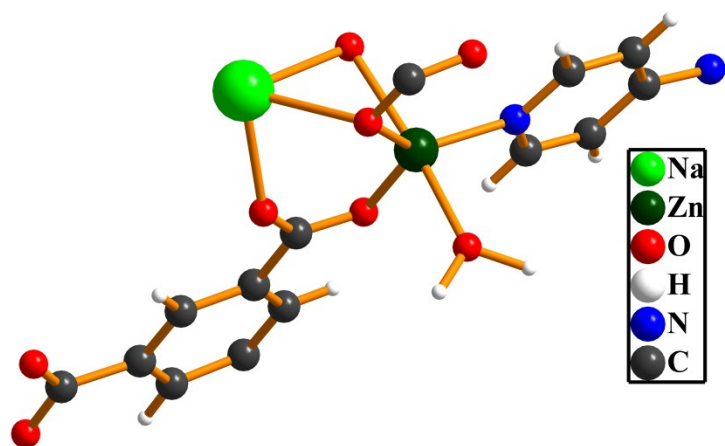

**Fig. S14** Assymertic unit of **1**. Color code: Zn (dark green), Na (green), C (dark gray), N (blue), O (red), H (white).

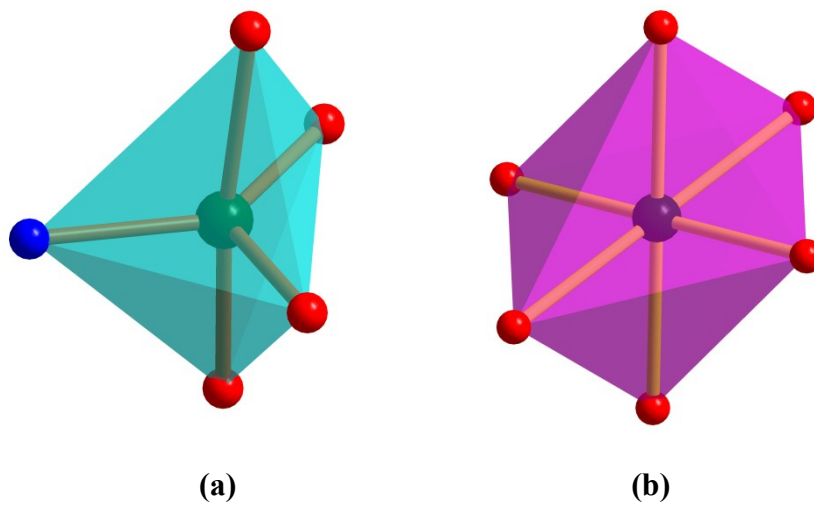

**Fig. S15** Distorted trigonal bipyramidal and octahedral co-ordination geometry around (a) Zn(II), and (b) Na(I) ion, present in **1**.

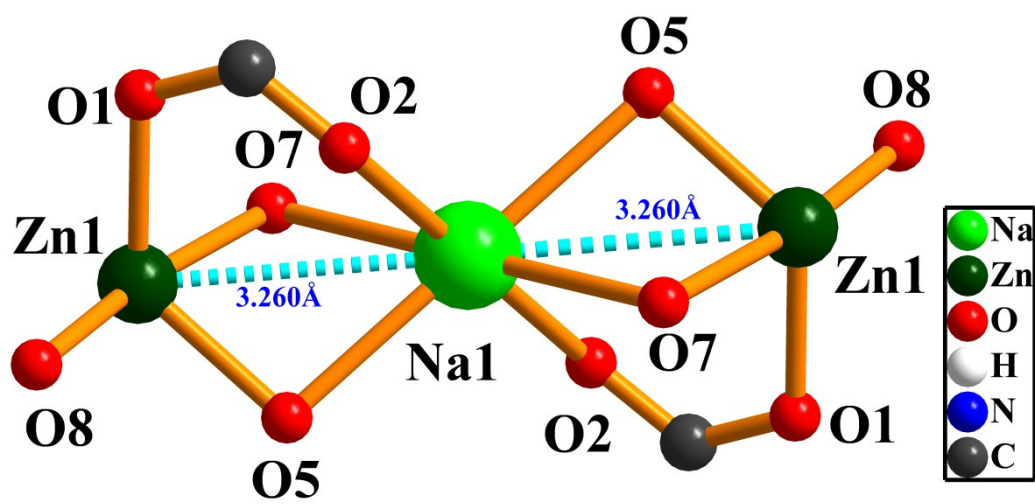

Fig. S16 Representation of [Zn<sub>2</sub>NaO<sub>8</sub>] cluster in 1.

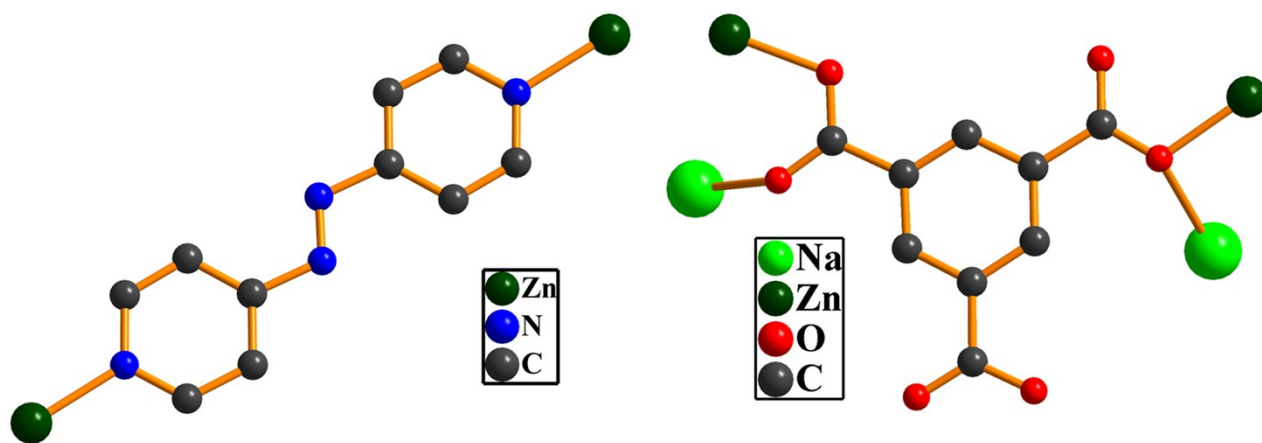

**Scheme S1.** Coordination modes of ligands in **1**.

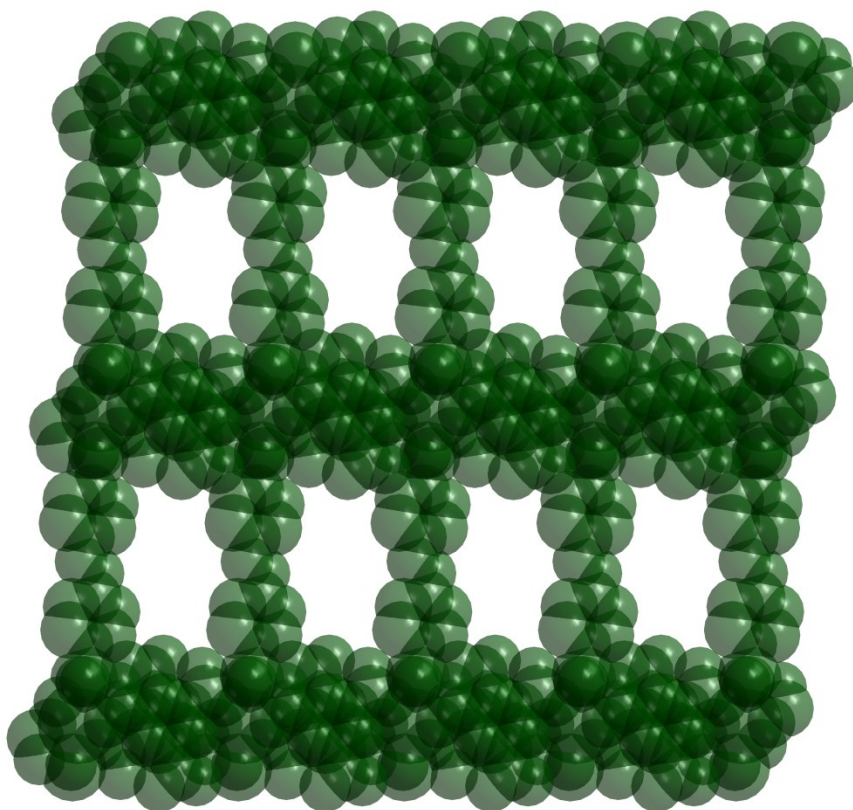

**Fig. S17** Space fill model of the 2D framework along *b*-axis in **1**.

## CV and GCDs at different ratios

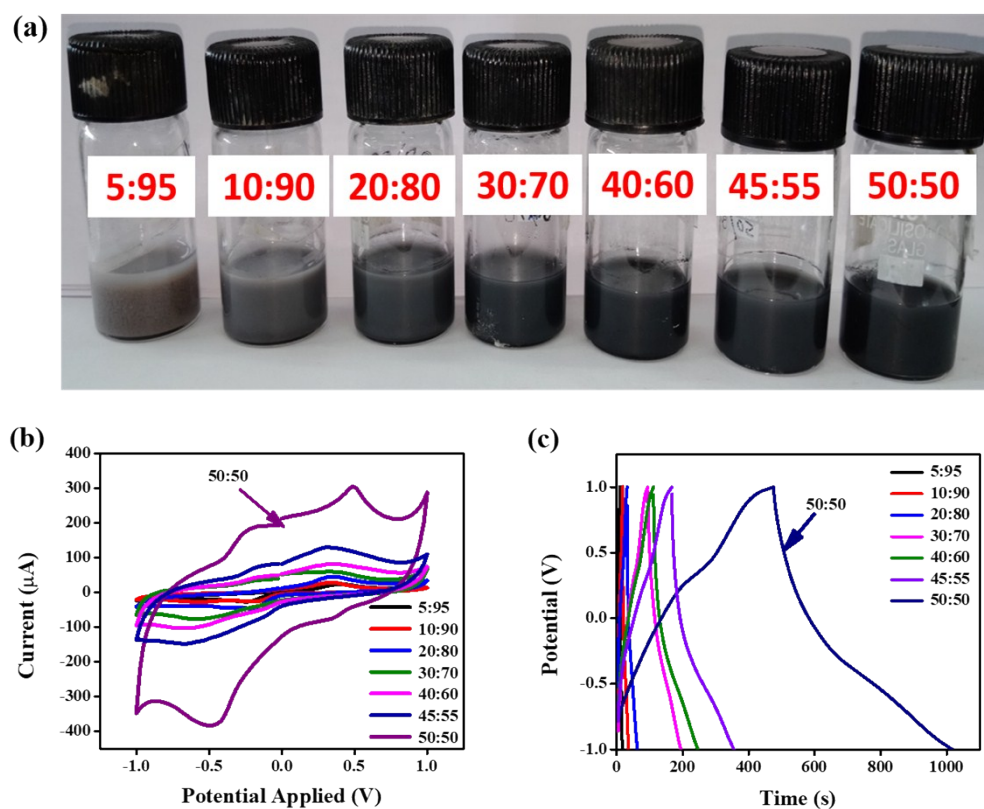

**Fig. S18** (a) A series of formed heterostructure **3** at different ratios of **1** and **2**, and (b,c) CV and GCD plots of formed heterostructures of **3** at different ratios of **1** and **2**. (Here. 5:95 indicates 5% of **2** and 95% of **1**, 10:90 indicates 10% of **2** and 90% of **1** and so on...)

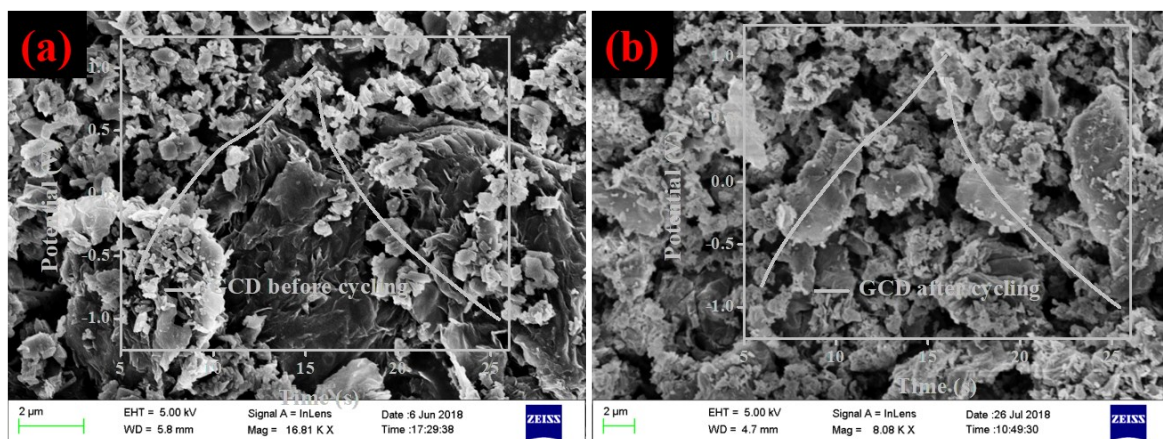

Fig. S19 GCD plots and SEM images of 3-GCE (a) before and (b) after cycling.

The supercapacitor properties of **3-GCE** has been analysed at higher mass loading with an effective mass of  $\sim 0.25$  mg and mass loading of  $\sim 3.5$  mg/cm<sup>2</sup> in addition to the original mass loading of 0.35 mg/cm<sup>2</sup>. The comparison of CV profiles of bare GCE and **3-GCE** clearly shows an enhanced CV area and better charge propagation in **3** (Fig. S21a). However, the current response was lesser than that obtained at lower mass loading as shown in Fig. 6c. The CV profiles were recorded at different scan rates as shown in Fig. S21b. Furthermore, GCD profiles were also recorded at different current densities (Fig. S21c). The discharge time was found to be lesser at each current density compared to that at lower mass loadings (Fig. 7e). The plot between specific capacitance and applied current densities shows a notable decrement in charge storage efficiency w.r.t. increasing current density (Fig. S21d). The maximum specific capacitance obtained was 251.2 F g<sup>-1</sup> at 1.6 A g<sup>-1</sup>, which kept on decreasing up to 84 F g<sup>-1</sup> at 4 A g<sup>-1</sup>. It was observed that at higher mass loading, specific capacitance decreases, which approves Stoller's findings (*Energy Environ. Sci.*, 2010, **3**, 1294–1301), and also in agreement with the general thumb rule that specific capacitance decreases on increasing mass loading.

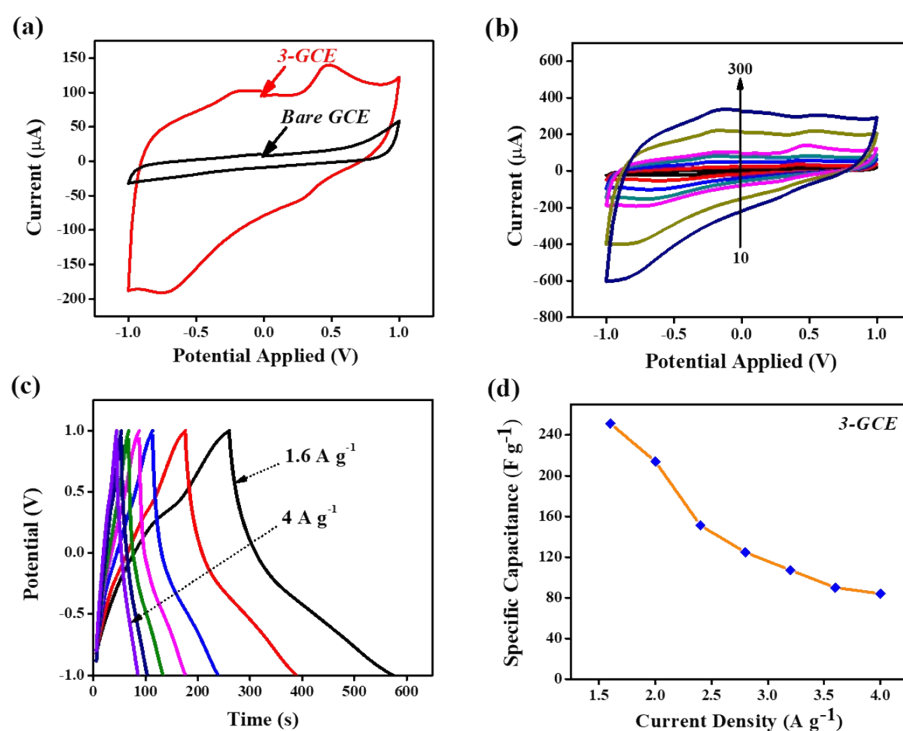

**Fig. S20** (a) Comparison of CV profiles of bare GCE and **3-GCE** at 100 mV s<sup>-1</sup>, (b) CV profiles of **3-GCE** at varied scan rates (10–300 mV s<sup>-1</sup>), (c) GCD plots of **3-GCE** at different current densities (1.6–4 A g<sup>-1</sup>), and (d) plot between specific capacitance and current density. (All results at higher mass loading  $\sim 3.5$  mg/cm<sup>2</sup>)



**Table S1.** Bond lengths [ $\text{\AA}$ ] and angles [ $^\circ$ ] for **1**.

| Bond distances      |            |
|---------------------|------------|
| Na(1)—O(2)          | 2.292(3)   |
| Na(1)—O(2)#1        | 2.292(3)   |
| Na(1)—O(5)#1        | 2.418(3)   |
| Na(1)—O(5)          | 2.420(3)   |
| Na(1)—O(7)#1        | 2.505(3)   |
| Na(1)—O(7)          | 2.505(3)   |
| Na(1)—Zn(1)#1       | 3.2595(5)  |
| Na(1)—Zn(1)         | 3.2595(5)  |
| Zn(1)—O(5)          | 1.991(3)   |
| Zn(1)—O(1)          | 2.000(3)   |
| Zn(1)—N(1)          | 2.073(3)   |
| Zn(1)—O(8)          | 2.098(4)   |
| Zn(1)—O(7)          | 2.250(3)   |
| Bond angles         |            |
| O(5)—Zn(1)—O(1)     | 124.01(12) |
| O(5)—Zn(1)—N(1)     | 136.57(13) |
| O(1)—Zn(1)—N(1)     | 98.92(13)  |
| O(5)—Zn(1)—O(8)     | 89.72(15)  |
| O(1)—Zn(1)—O(8)     | 93.69(17)  |
| N(1)—Zn(1)—O(8)     | 94.12(15)  |
| O(5)—Zn(1)—O(7)     | 83.01(12)  |
| O(1)—Zn(1)—O(7)     | 87.84(14)  |
| N(1)—Zn(1)—O(7)     | 93.30(13)  |
| O(8)—Zn(1)—O(7)     | 172.10(13) |
| O(5)—Zn(1)—Na(1)    | 47.67(8)   |
| O(1)—Zn(1)—Na(1)    | 85.61(9)   |
| N(1)—Zn(1)—Na(1)    | 143.11(10) |
| O(8)—Zn(1)—Na(1)    | 122.27(11) |
| O(7)—Zn(1)—Na(1)    | 50.06(8)   |
| O(2)—Na(1)—O(2)#1   | 180.0      |
| O(2)—Na(1)—O(5)#1   | 101.26(11) |
| O(2)#1—Na(1)—O(5)#1 | 78.74(11)  |
| O(2)—Na(1)—O(5)     | 78.74(11)  |
| O(2)#1—Na(1)—O(5)   | 101.26(11) |
| O(5)#1—Na(1)—O(5)   | 180.0      |
| O(2)—Na(1)—O(7)#1   | 93.17(11)  |
| O(2)#1—Na(1)—O(7)#1 | 86.83(11)  |
| O(5)#1—Na(1)—O(7)#1 | 69.79(10)  |

|                       |            |
|-----------------------|------------|
| O(5) —Na(1) —O(7)#1   | 110.21(10) |
| O(2) —Na(1) —O(7)     | 86.83(11)  |
| O(2)#1—Na(1) —O(7)    | 93.17(11)  |
| O(5)#1—Na(1) —O(7)    | 110.26(10) |
| O(5) —Na(1) —O(7)     | 69.79(10)  |
| O(7)#1—Na(1) —O(7)    | 180.0      |
| O(2) —Na(1) —Zn(1)#1  | 121.03(8)  |
| O(2)#1—Na(1) —Zn(1)#1 | 58.97(8)   |
| O(5)#1—Na(1) —Zn(1)#1 | 37.50(6)   |
| O(5) —Na(1) —Zn(1)#1  | 142.50(6)  |
| O(7)#1—Na(1) —Zn(1)#1 | 43.55(7)   |
| O(7) —Na(1) —Zn(1)#1  | 136.45(7)  |
| O(7) —Na(1) —Zn(1)    | 43.55(7)   |
| Zn(1)#1—Na(1) —Zn(1)  | 180.0      |

Symmetry transformations used to generate equivalent atoms:

#1 -x,-y,-z #2 -x+1,-y+1,-z-2 #3 x+1,y,z #4 x-1,y,z
